# Supplementary material
Source: HighWire-hosted journal article supplement (http://www.qdcxjkg.com/highwire/filestream/113708/field_highwire_adjunct_files/0/Suplementary_files_01012_2011.pdf)
Supplement: Suplementary_files_01012_2011.pdf [file Suplementary_files_01012_2011.pdf]

**Table 1:** Clinical and hemodynamic data, according to the time of diagnosis of pulmonary hypertension

|                                          | <b>Before July 2007<br/>N= 861</b> | <b>After July 2007<br/>N= 167</b> |
|------------------------------------------|------------------------------------|-----------------------------------|
| <b>Age (yr)</b>                          | 45 ± 17                            | 51 ± 18*                          |
| <b>Gender (%male)</b>                    | 29%                                | 26%                               |
| <b>Time symptoms-<br/>diagnosis (yr)</b> | 3.7 ± 6.3                          | 2.2 ± 4.7*                        |
| <b>WHO FC III-IV</b>                     | 69%                                | 68%                               |
| <b>mPAP (mmHg)</b>                       | 56 ± 16                            | 48 ± 13*                          |
| <b>CI (l/min/m<sup>2</sup>)</b>          | 2.6 ± 0.8                          | 2.8 ± 1.0                         |
| <b>PVR (WU)</b>                          | 12 ± 7                             | 10 ± 6*                           |
| <b>RAP (mmHg)</b>                        | 8.6 ± 5.2                          | 9.6 ± 6.1                         |
| <b>6MWD (m)</b>                          | 360 ± 117                          | 378 ± 135                         |

\*p<0.05 compared with the group diagnosed before July 2007

**Definition of abbreviations:** WHO-FC: functional classification according to World Health Organization mPAP: mean pulmonary artery pressure. PVR: pulmonary vascular resistance. CI: cardiac index. RAP: right atrial pressure. 6MWD: 6-minute walk distance.

**All patients**

**Patients with IPAH**

|                                  | <i>HR [CI 95%]</i> | <i>p-value</i> | <i>HR [CI 95%]</i> | <i>p-value</i> |
|----------------------------------|--------------------|----------------|--------------------|----------------|
| <b>Age (10 years)</b>            | 1.15 (1.08-1.23)   | <0.001         | 1.08 (0.95-1.23)   | 0.234          |
| <b>Gender (men)</b>              | 1.27 (1.00-1.60)   | 0.045          | 2.96 (1.96-4.53)   | <0.001         |
| <b>6 MWT (20m)</b>               | 0.93 (0.91-0.95)   | <0.001         | 0.92 (0.88-0.96)   | <0.001         |
| <b>WHO-FC</b>                    | 1.65 (1.38-1.98)   | <0.001         | 2.90 (2.02-4.18)   | <0.001         |
| <b>Pericardial effusion</b>      | 1.34 (1.01-2.10)   | 0.042          | 1.1 (0.85-1.6)     | 0.364          |
| <b>Year of diagnosis</b>         |                    | 0.717          |                    | 0.506          |
| <b>1998- 2001</b>                | reference          | -              | reference          | -              |
| <b>2002-2004</b>                 | 1.12 (0.85-1.48)   | 0.428          | 0.74 (0.44-1.26)   | 0.269          |
| <b>2005-2008</b>                 | 1.04 (0.76-1.42)   | 0.831          | 0.80 (0.44-1.43)   | 0.443          |
| <b>CO ( l/min)</b>               | 0.76 (0.69-0.83)   | <0.001         | 0.71 (0.58-0.88)   | 0.001          |
| <b>mPAP (5 mm Hg)</b>            | 1.00 (0.97-1.04)   | 0.912          | 1.12 (1.04-1.20)   | 0.002          |
| <b>PVR (5 UW)</b>                | 1.15 (1.07-1.24)   | <0.001         | 1.25 (1.07-1.45)   | 0.004          |
| <b>RAP (5 mm Hg)</b>             | 1.40 (1.27-1.56)   | <0.001         | 1.81 (1.43-2.28)   | <0.001         |
| <b>IC ( l/min/m<sup>2</sup>)</b> | 0.60 (0.50-0.72)   | <0.001         | 0.49 (0.33-0.72)   | <0.001         |
| <b>DLCO (10)</b>                 | 0.83 (0.78-0.89)   | <0.001         | 0.84 (0.75-0.94)   | 0.002          |
| <b>BP (10 mm Hg)</b>             | 0.98 (0.93-1.04)   | 0.552          | 0.93 (0.83-1.04)   | 0.203          |
| <b>HR (10 )</b>                  | 1.08 (0.97-1.20)   | 0.179          | 1.36 (1.12-1.65)   | 0.002          |
| <b>Subtypes of PH</b>            |                    | <0.001         |                    |                |
| <b>Idiopathic</b>                | reference.         | -              |                    |                |
| <b>CTD</b>                       | 1.74 (1.25-2.42)   | 0.001          |                    |                |
| <b>CHD</b>                       | 0.69 (0.47-1.01)   | 0.057          |                    |                |
| <b>CTEPH</b>                     | 0.98 (0.66-1.45)   | 0.911          |                    |                |
| <b>HIV</b>                       | 0.91 (0.51-1.62)   | 0.738          |                    |                |
| <b>PoPH</b>                      | 2.00 (1.25-3.13)   | 0.004          |                    |                |
| <b>TOS</b>                       | 0.87 (0.49-1.53)   | 0.616          |                    |                |
| <b>PVOD</b>                      | 4.18 (1.69-10.3)   | 0.002          |                    |                |
| <b>2 or more etiologies</b>      | 1.00 (0.64-1.57)   | 0.991          |                    |                |
| <b>others</b>                    | 1.82 (1.06-3.11)   | 0.029          |                    |                |

**Table 2:** Univariate predictors of death in Cox's proportional hazards analysis  
**Definition of abbreviations:** IPAH: idiopathic PAH WHO-FC: functional classification according to World Health Organization. 6MWD: 6-minute walk distance. WHO-FC: functional classification according to World health organization. mPAP: mean pulmonary artery pressure. PVR: pulmonary vascular resistance. WU: Wood Units. CI: cardiac index. RAP: right atrial

pressure. CI: cardiac index. HR: Heart rate. PH: pulmonary hypertension. CTD: connective tissue disease. CHD: congenital heart disease. CTEPH: chronic thromboembolic pulmonary hypertension. HIV: human immunodeficiency virus. PoPH: portopulmonary hypertension. TOS: Toxic oil syndrome. PVOD: pulmonary veno-occlusive disease.

**Table 3:** Observed survival in current PAH registries from time of diagnosis

|                           | REHAP | PHC | French Registry | REVEAL |
|---------------------------|-------|-----|-----------------|--------|
| <b>Patients with PAH</b>  |       |     |                 |        |
| 1 year                    | 86%   | 86% | 87%             | 88%    |
| 3 years                   | 75%   | 69% | 67%             | 72%    |
| <b>Patients with IPAH</b> |       |     |                 |        |
| 1 year                    | 89%   | 92% | 83%             |        |
| 3 years                   | 77%   | 75% | 58%             |        |

**Definition of abbreviations:** PAH: pulmonary arterial hypertension. IPAH: idiopathic pulmonary arterial hypertension. REHAP: Spanish Registry of Pulmonary Arterial Hypertension PHC: Pulmonary Hypertension Connection. REVEAL: Registry to Evaluate Early and Long-Term Pulmonary Arterial Hypertension Disease Management.
